# Supplementary material for: Compliance with anthelmintic treatment in the neglected tropical diseases control programmes: a systematic review
Source: PubMed Central journal article supplement (PMC4729159; doi:10.1186/s13071-016-1311-1), 2016-01-27
Supplement: 13071_2016_1311_MOESM2_ESM.pdf [file 13071_2016_1311_MOESM2_ESM.pdf]

## **Additional file 2: full search strategy for PubMed**

Full search strategy:

("soil-transmitted helminths") OR helminths[MeSH Terms] OR helminths OR helminth OR Helminthiasis OR "intestinal parasites" OR "intestinal helminths" OR ascariasis[MeSH Terms] OR ascari\* OR hookworm OR onchocerciasis[MeSH Terms] OR "river blindness" OR schistosomiasis OR schistosomiasis[MeSH Terms] OR bilharz\* OR "elephantiasis"[MeSH Terms] OR "lymphatic filariasis" OR "Wuchereria bancrofti" OR "Brugia malayi" OR wucherer\* OR brugia\* OR strongyloidiasis[MeSH Terms] OR strongyl\* OR ancylostomatoidea[MeSH Terms] OR Ancylostoma OR Necator OR trichuris[MeSH Terms] OR trichur\* OR whipworm OR geohelminths OR onchocerciasis OR onchocerc\* OR trachoma[MeSH Terms] OR trachoma OR trichiasis) AND (compliance OR non-compliance OR non-compliers OR adherence OR non-adherence OR refusal OR "Medication Adherence/statistics and numerical data"[MAJR] OR "Medication Adherence"[MAJR])
